# Supplementary material for: A climate suitability index for ecological habitats applied to terrestrial arthropods in the Mediterranean Region
Source: Copernicus journal article supplement (doi:10.5194/egusphere-2024-1954), 2024-07-18
Supplement: Supplementary file 1 [file egusphere-2024-1954-supplement.pdf]

# Supplementary Information: A climate suitability index for ecological habitats applied to terrestrial arthropods in the Mediterranean Region

James M. Ciarlo<sup>1,2</sup>, Monique Borg Inguanez<sup>3</sup>, Erika Coppola<sup>2</sup>, Aaron Micallef<sup>4,5</sup>, David Mifsud<sup>1</sup>

- 5 <sup>1</sup>Institute of Earth Systems, University of Malta, Msida, Malta  
<sup>2</sup>Abdus Salam International Centre for Theoretical Physics, Trieste, Italy  
<sup>3</sup>Department of Statistics and Operations Research, University of Malta, Msida, Malta  
<sup>4</sup>Department of Geosciences, University of Malta, Msida, Malta  
<sup>5</sup>Monterey Bay Aquarium Research Institute, Moss Landing, CA, USA

10 *Correspondence to:* James M. Ciarlo` (james.ciarlo[at]um.edu.mt)

## 1 Considerations of Climate Indices

Additional variables to the ones presented in Table 2 were considered. These are listed in Table S1 below. Most of these were not considered due to the strong relationship with other variables such as prsum and tasmean. The wind extreme variable, fg6bft was omitted as too many observation points were returning a 0-value. The relationship between the final  
15 selected climate indices is shown in Figure S1 (full image on github), and the correlation coefficients, are summarised in Table S2.

**Table S1: The eight climate indices used in this study to describe the climatological component of an ecological niche**

| Short Name | Long Name                                                  | Units     |
|------------|------------------------------------------------------------|-----------|
| r10mm      | Annual mean of heavy precipitation days                    | days      |
| r20mm      | Annual mean of very heavy precipitation days               | days      |
| rx5day     | Maximum 5-day precipitation in time period                 | mm/5-days |
| nrx5day    | Annual mean of number of 5-day precipitation periods       | days      |
| tx10p      | Percentage of very cold days wrt 10th percentile           | %         |
| tx90p      | Percentage of very warm days wrt 90th percentile           | %         |
| tasp10     | 10th percentile of Near-Surface Air Temperature            | °C        |
| tasp90     | 90th percentile of Near-Surface Air Temperature            | °C        |
| fg6bft     | Annual mean of days with wind speed $\geq$ 6Bft (10.8 m/s) | days      |

**Table S2: Correlation coefficients from the matrix of scatter-plots shown in Figure S1.**

|          | rx1day   | prsum    | tasmean  | cwfi                  | hwfi     | windmean | orog     |
|----------|----------|----------|----------|-----------------------|----------|----------|----------|
| cdd      | 0.091839 | 0.366449 | 0.474165 | 0.106336              | 0.001705 | 0.010041 | 0.002390 |
| rx1day   | -        | 0.075989 | 0.008508 | $1.88 \times 10^{-9}$ | 0.082247 | 0.116917 | 0.035843 |
| prsum    |          | -        | 0.367381 | 0.043809              | 0.026970 | 0.010039 | 0.001709 |
| tasmean  |          |          | -        | 0.018775              | 0.006116 | 0.024940 | 0.349485 |
| cwfi     |          |          |          | -                     | 0.20428  | 0.014931 | 0.020600 |
| hwfi     |          |          |          |                       | -        | 0.24554  | 0.004873 |
| windmean |          |          |          |                       |          | -        | 0.086998 |
| orog     |          |          |          |                       |          |          | -        |

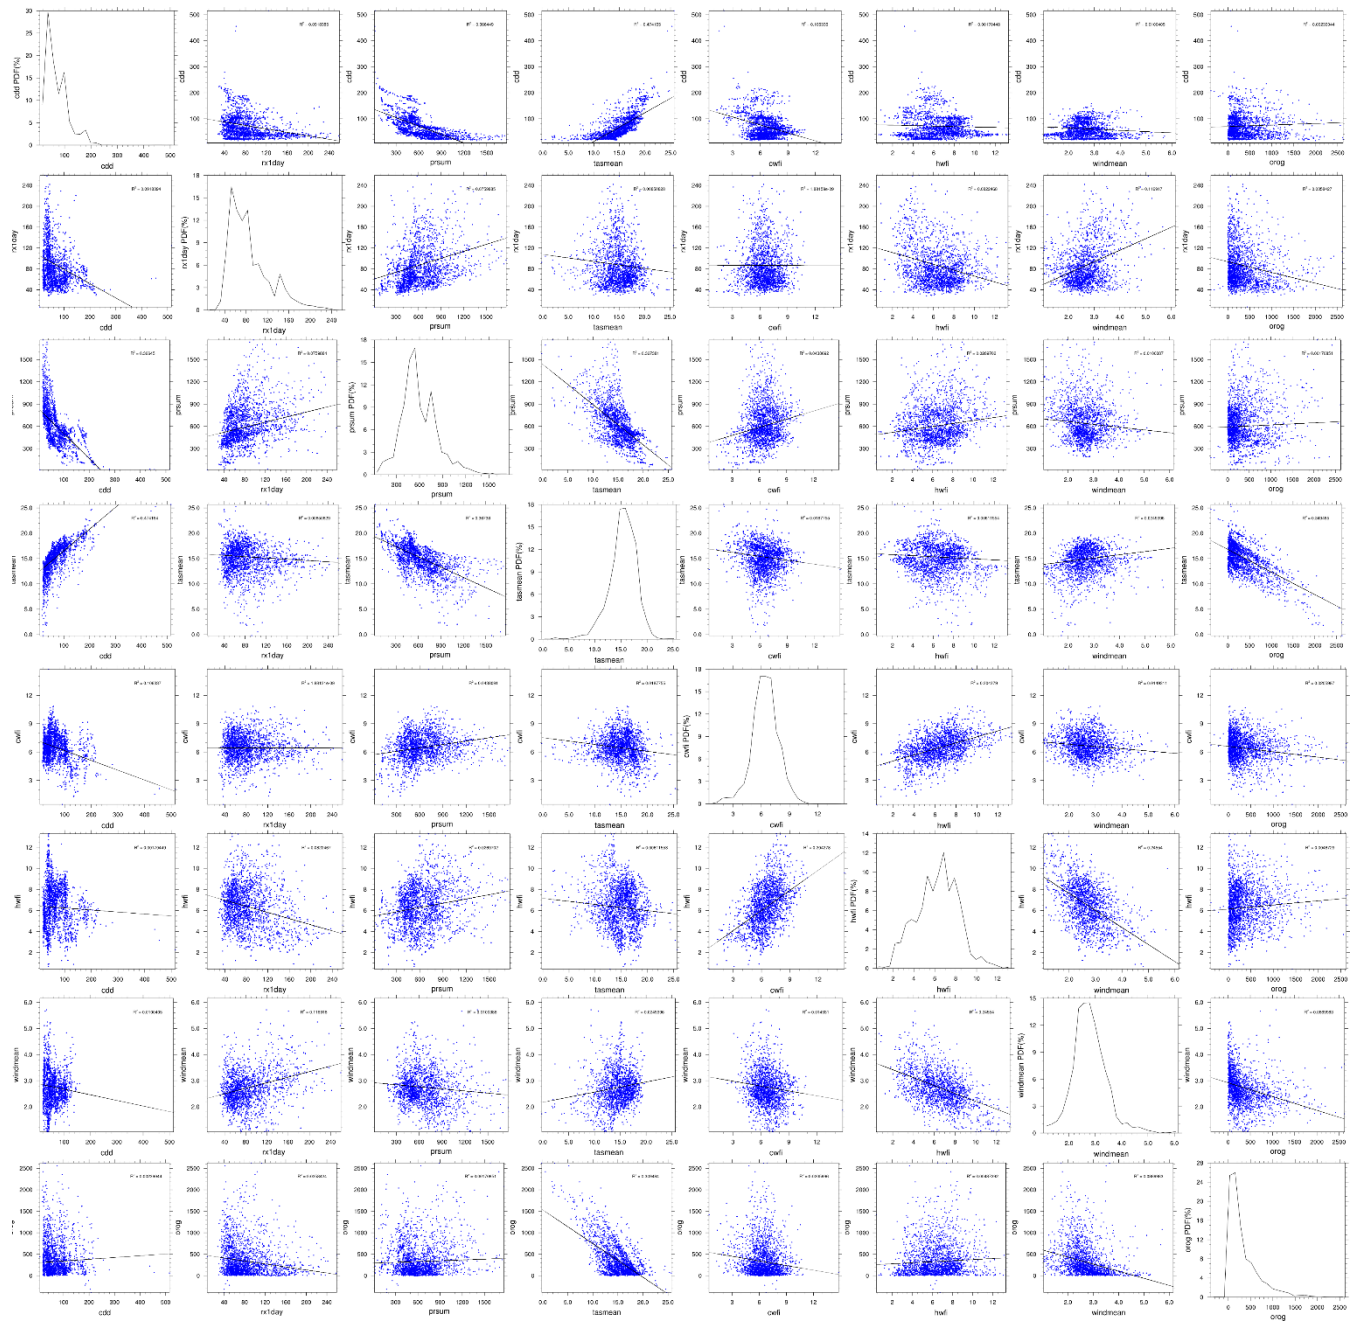

25 **Figure S1: A matrix of scatter-plots for the eight climate indices (derived from the 1980-2010 E-OBS dataset) extracted from the grid-cells that correspond to the coordinates where *Spilostethus pandurus* was observed (from the iNaturalist dataset). The plots include the regression line and R2 of each pair, as well as the PDF for each index.**

## 2 $EI_s$ assessment

30 The paper makes use of 8 different species to explore the effectiveness of the  $EI_s$  metric under different conditions. The complete output associated with this metric for all PSIs (except *Spilostethus pandurus*), and analogous to Figure 4 is given in Figures S2-S24. The  $EI_s$  products obtained from the E-OBS, Ens6, and WMD03 data-sets are shown in Figures S2-S8, S9-S16, S17-S24 respectively. Note in Figure S4, that *Brachytrypes megacephalus* does not produce a spatial  $EI_s$  map as none of the observation points could be used with the E-OBS data-set.

35

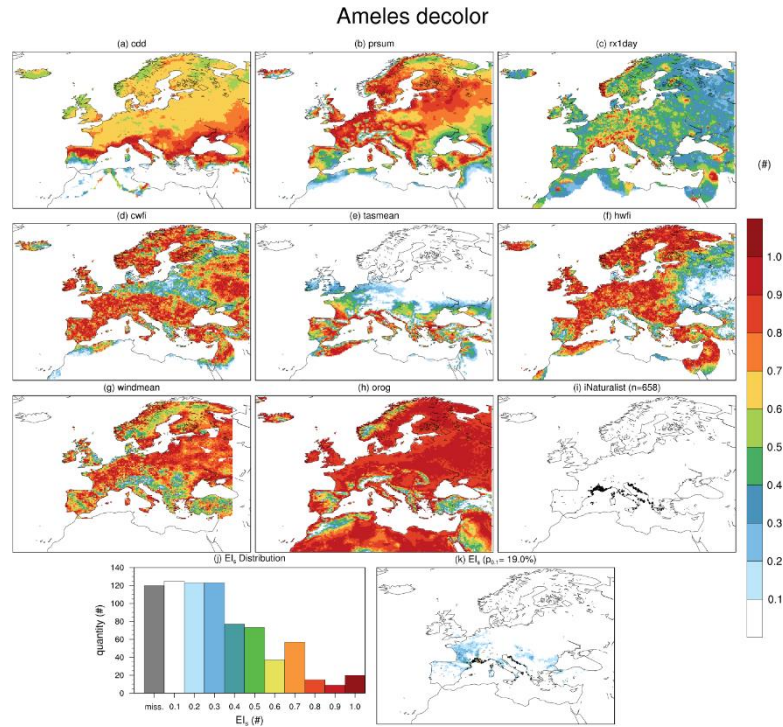

**Figure S2.** The  $EI_s$  products using E-OBS, analogous to Figure 4 for *Ameles decolor*.

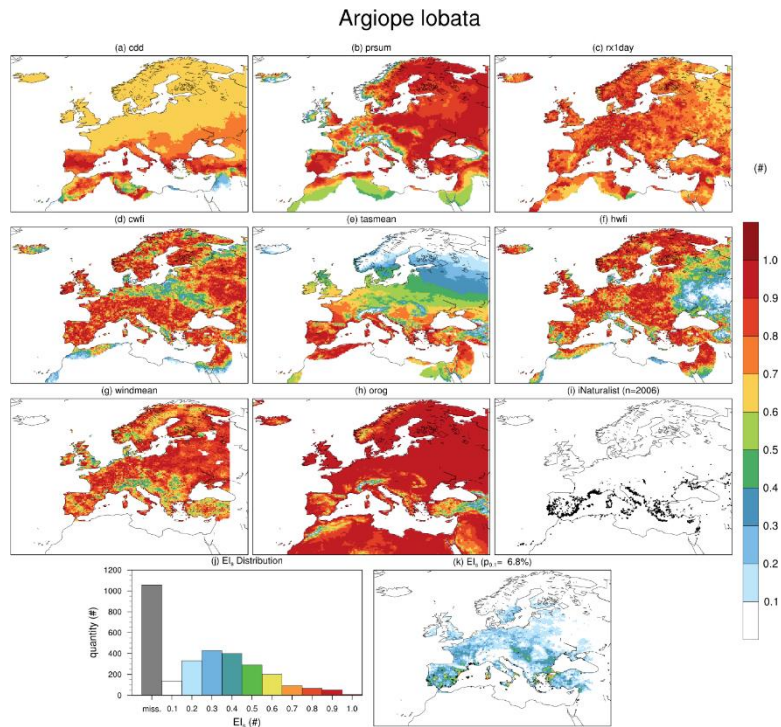

Figure S3. The  $EI_s$  products using E-OBS, analogous to Figure 4 for *Argiope lobata*.

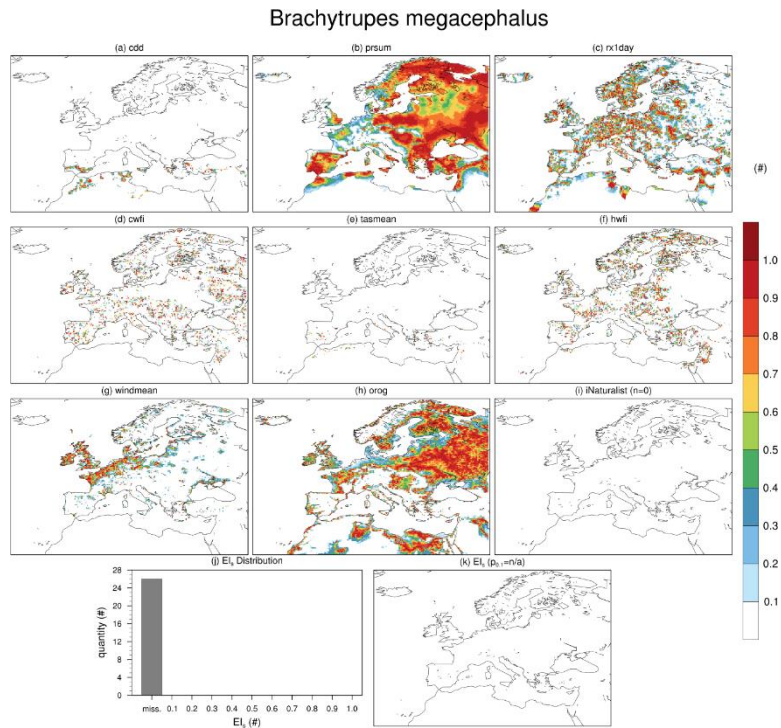

Figure S4. The  $EI_s$  products using E-OBS, analogous to Figure 4 for *Brachytripes megacephalus*.

### Polyommatus celina

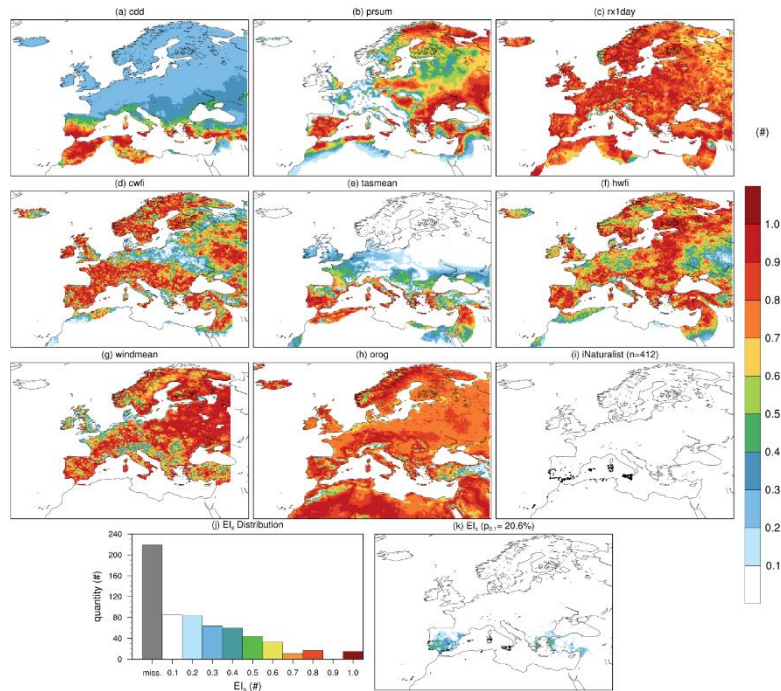

Figure S5. The  $EI_s$  products using E-OBS, analogous to Figure 4 for *Polyommatus celina*.

### Scarabaeus variolosus

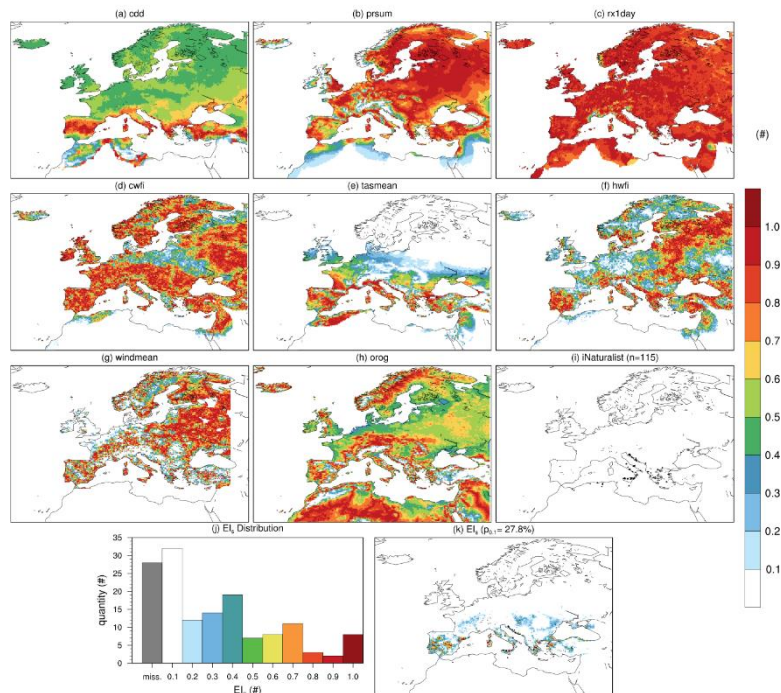

45 Figure S6. The  $EI_s$  products using E-OBS, analogous to Figure 4 for *Scarabaeus variolosus*.

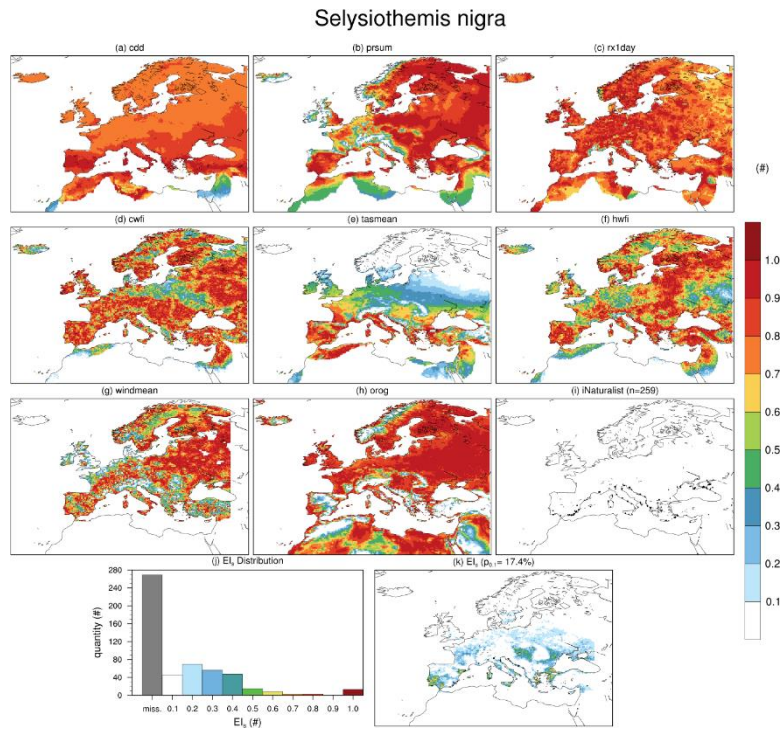

Figure S7. The  $EI_s$  products using E-OBS, analogous to Figure 4 for *Selysiothemis nigra*.

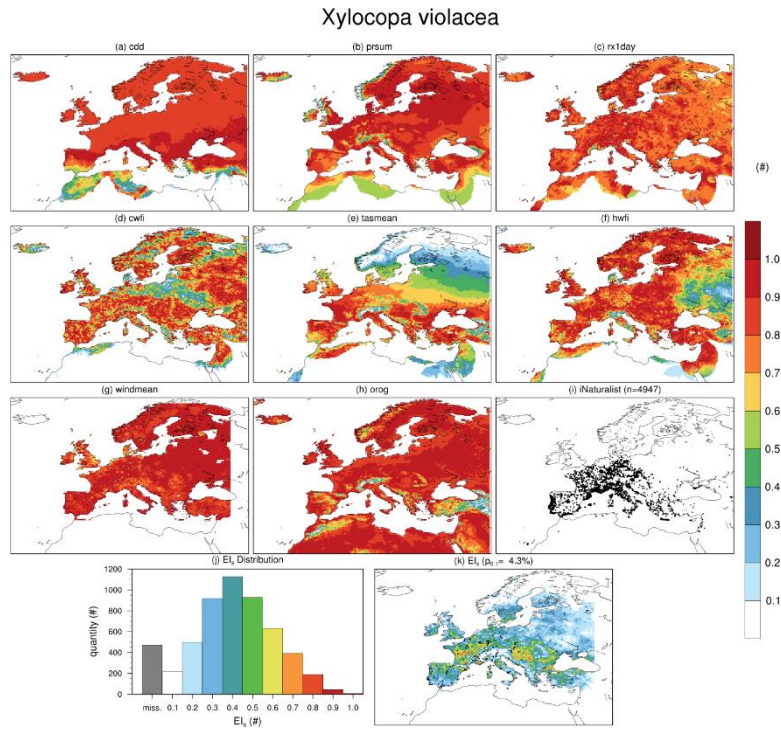

Figure S8. The  $EI_s$  products using E-OBS, analogous to Figure 4 for *Xylocopa violacea*.

### Ameles decolor

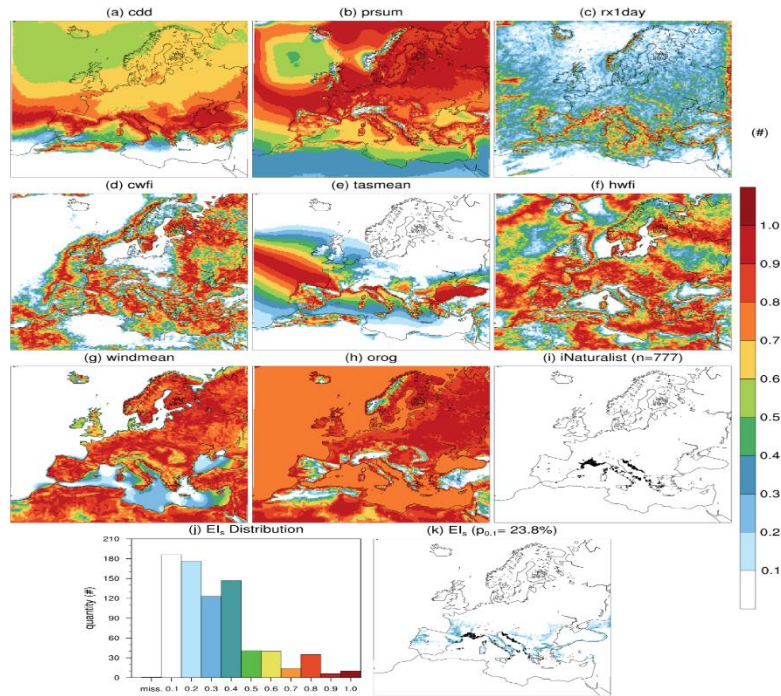

50

Figure S9. The  $EI_s$  products using Ens6, analogous to Figure 4 for *Ameles decolor*.

### Argiope lobata

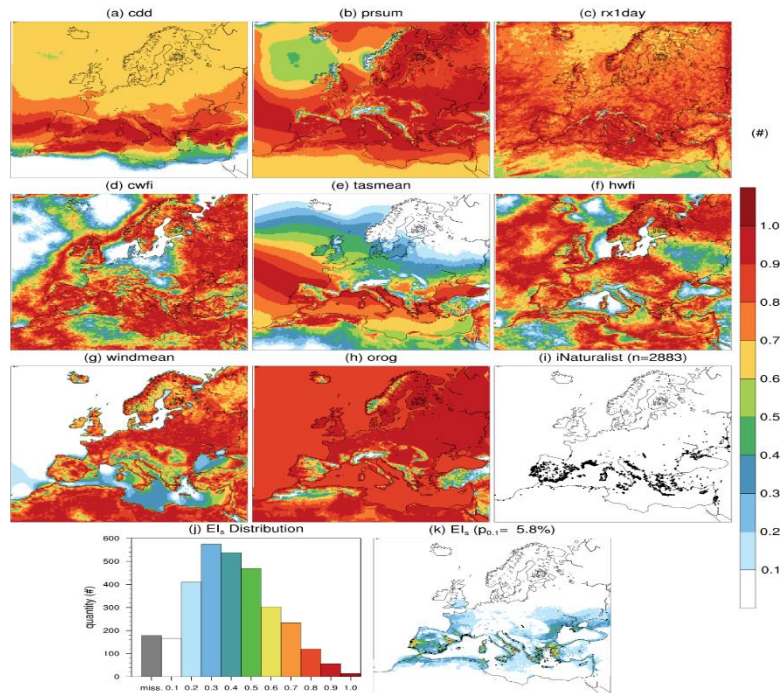

Figure S10. The  $EI_s$  products using Ens6, analogous to Figure 4 for *Argiope lobata*.



### Brachytrupes megacephalus

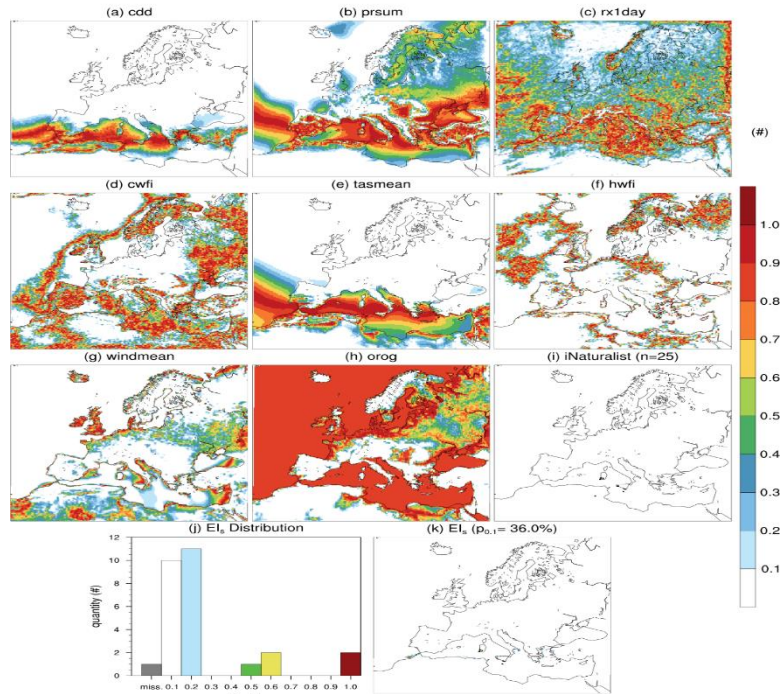

55 Figure S11. The  $EI_s$  products using Ens6, analogous to Figure 4 for *Brachytrupes megacephalus*.

### Polyommatus celina

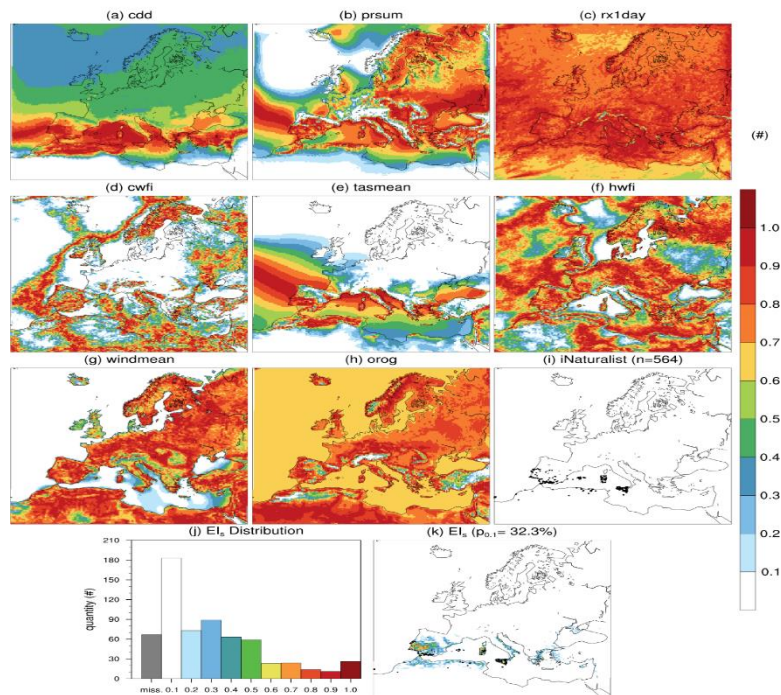

Figure S12. The  $EI_s$  products using Ens6, analogous to Figure 4 for *Polyommatus celina*.

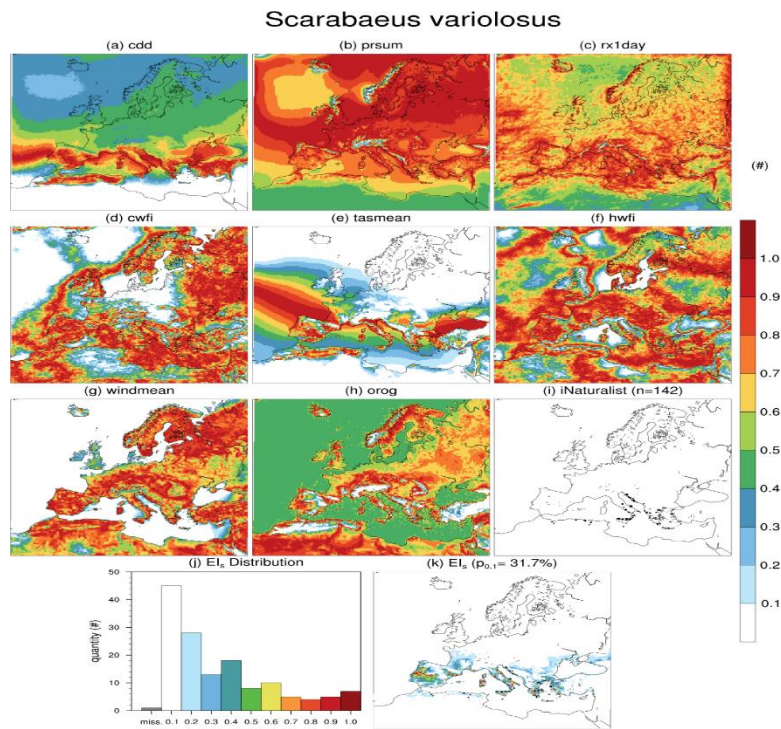

Figure S13. The  $EI_s$  products using Ens6, analogous to Figure 4 for *Scarabaeus variolosus*.

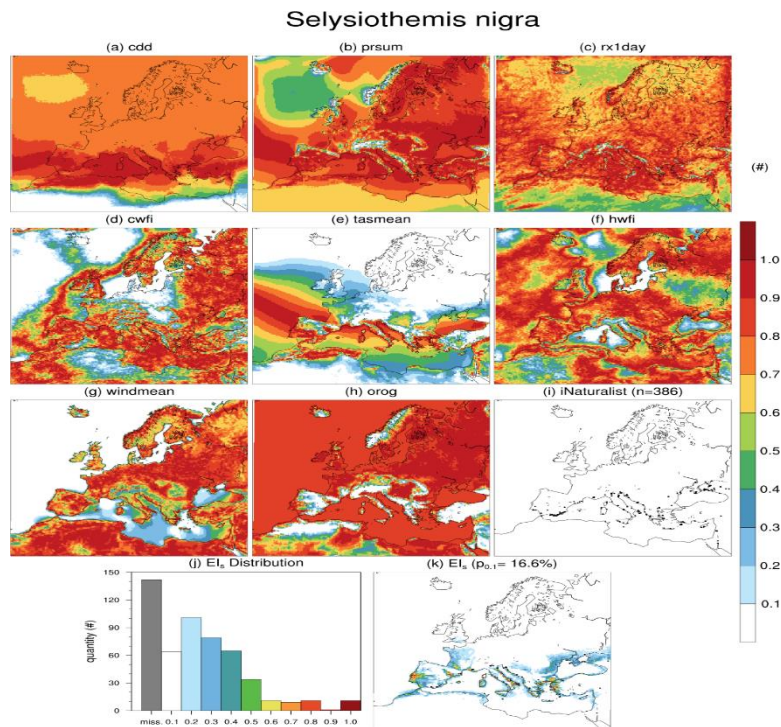

Figure S14. The  $EI_s$  products using Ens6, analogous to Figure 4 for *Selysiotthemis nigra*.

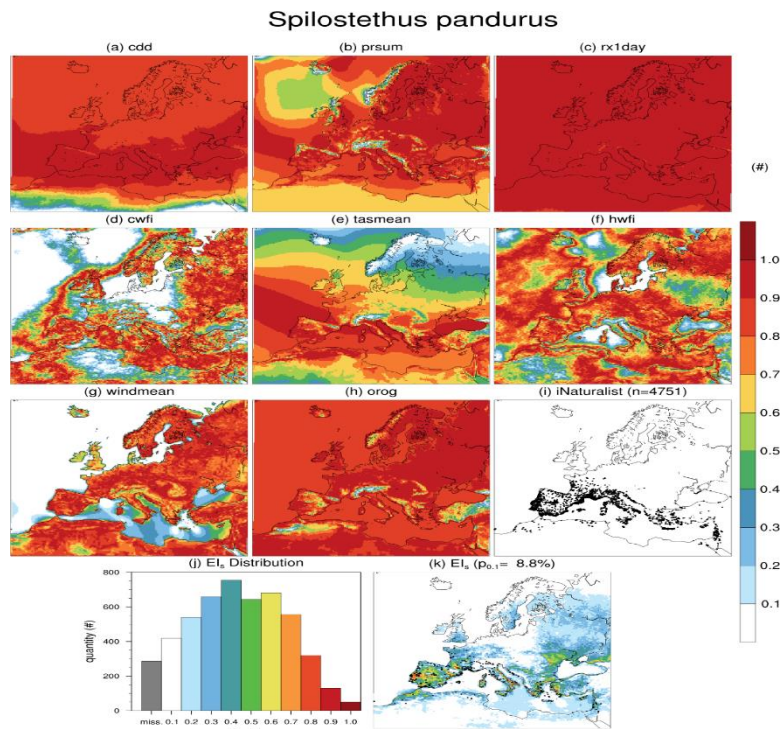

Figure S15. The  $EI_s$  products using Ens6, analogous to Figure 4 for *Spilostethus pandurus*.

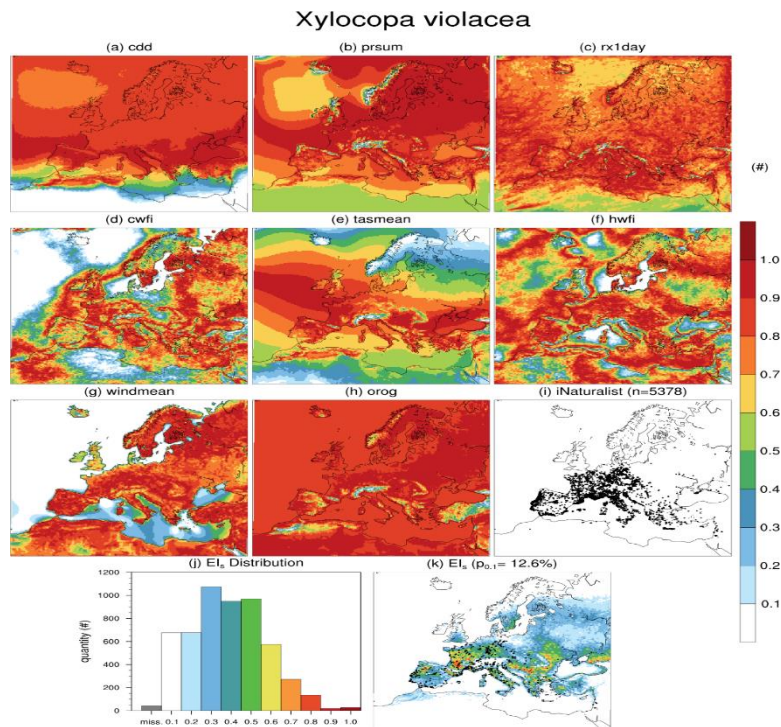

65 Figure S16. The  $EI_s$  products using Ens6, analogous to Figure 4 for *Xylocopa violacea*.

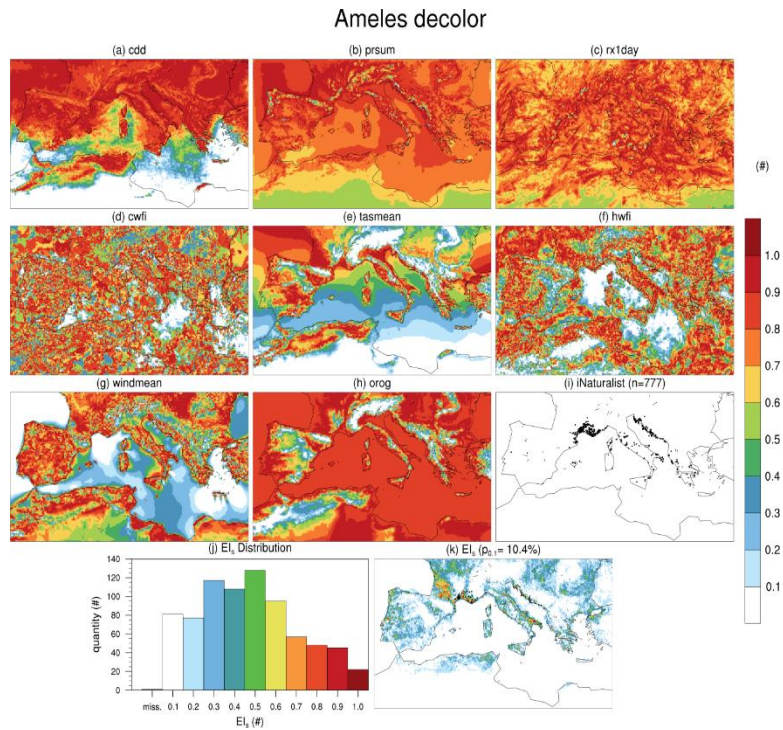

**Figure S17.** The  $EI_i$  products using WMD03, analogous to Figure 4 for *Ameles decolor*.

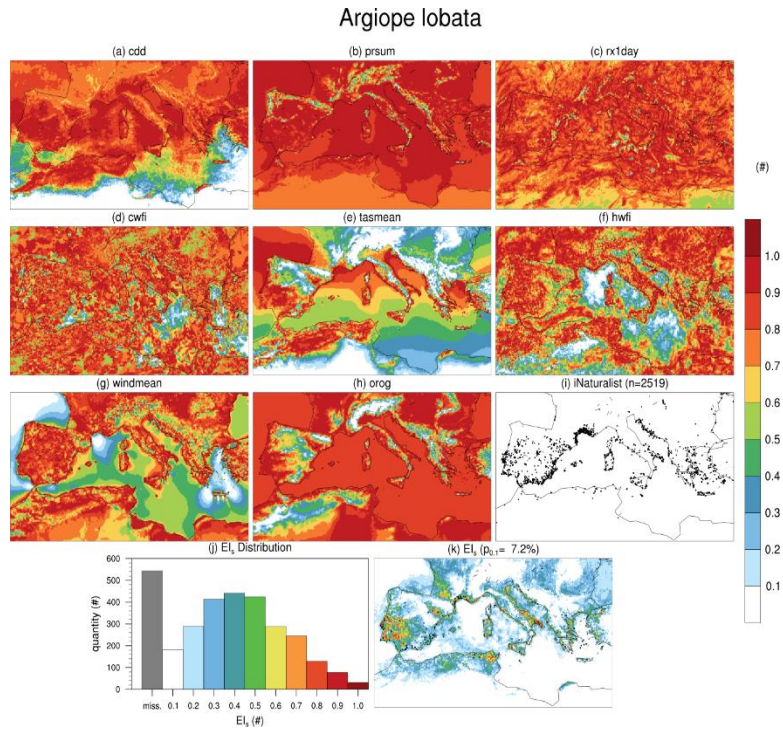

**Figure S18.** The  $EI_i$  products using WMD03, analogous to Figure 4 for *Argiope lobata*.

### Brachytrupes megacephalus

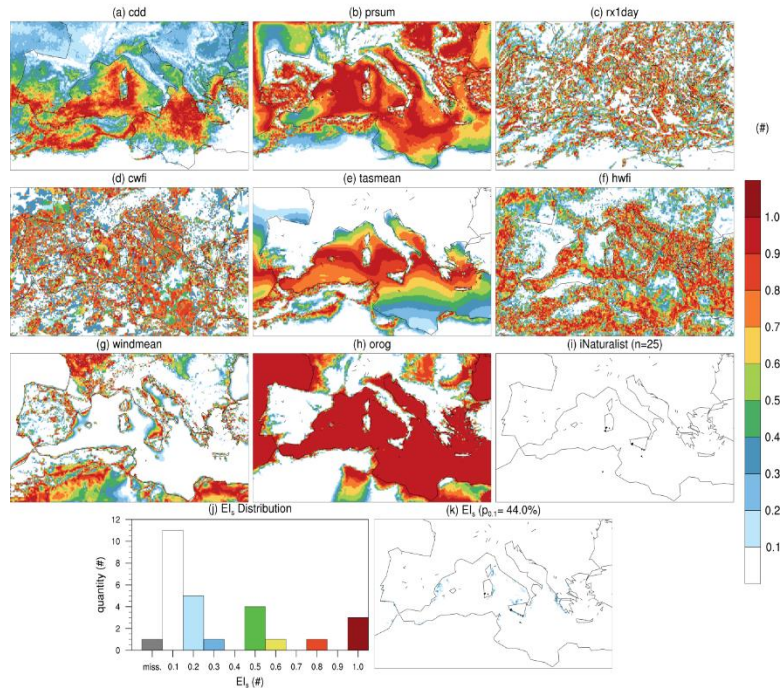

70

Figure S19. The  $EI_i$  products using WMD03, analogous to Figure 4 for *Brachytrupes megacephalus*.

### Polyommatus celina

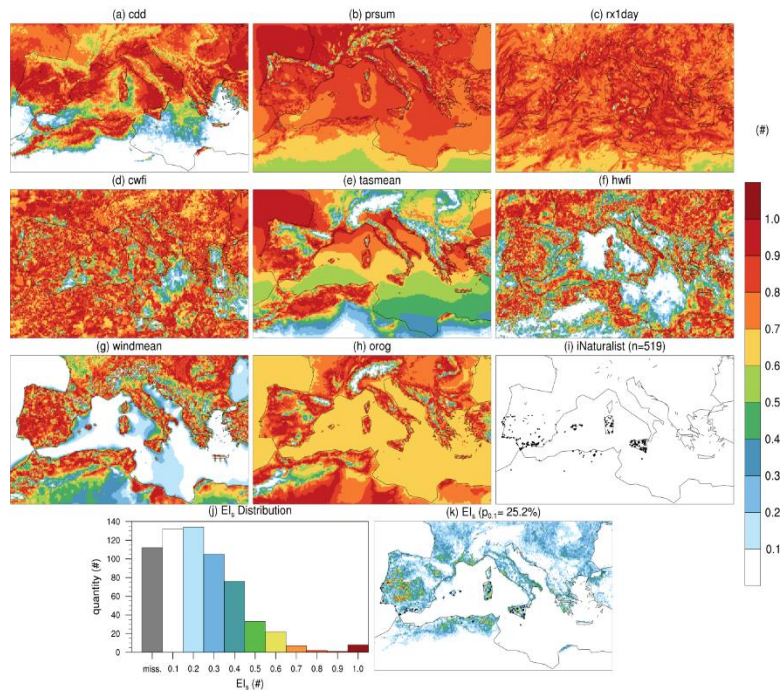

Figure S20. The  $EI_i$  products using WMD03, analogous to Figure 4 for *Polyommatus celina*.

### Scarabaeus variolosus

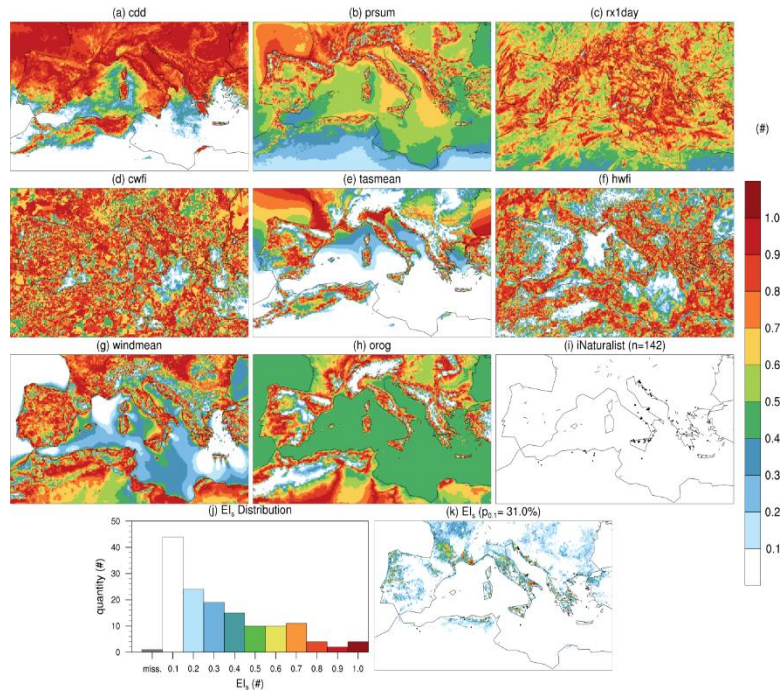

75 Figure S21. The  $EI_i$  products using WMD03, analogous to Figure 4 for *Scarabaeus variolosus*.

### Selysiothemis nigra

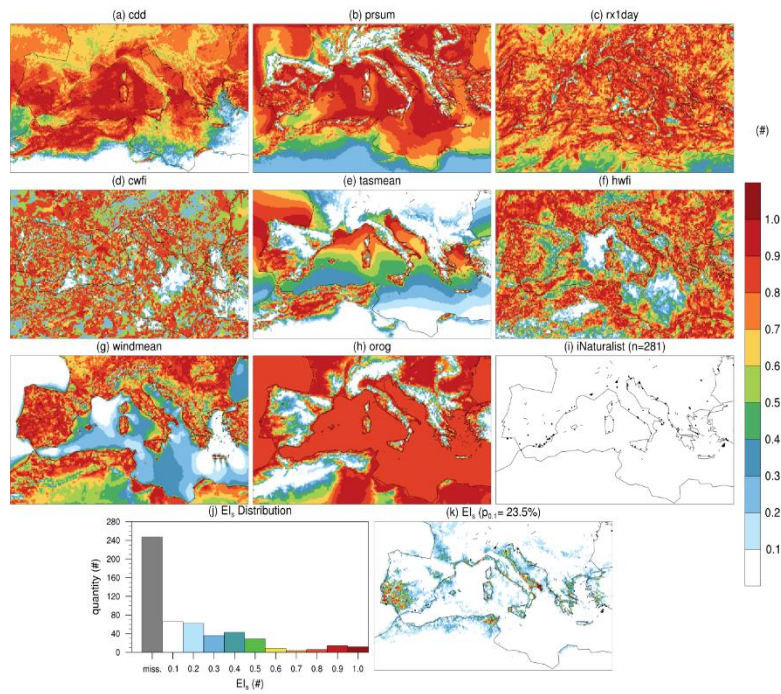

Figure S22. The  $EI_i$  products using WMD03, analogous to Figure 4 for *Selysiothemis nigra*.

### Spilostethus pandurus

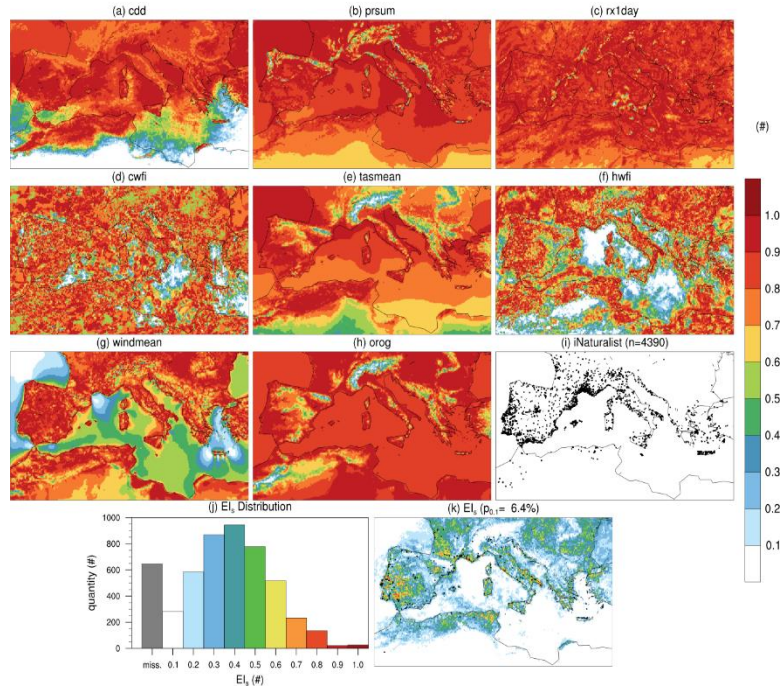

Figure S23. The  $EI_i$  products using WMD03, analogous to Figure 4 for *Spilostethus pandurus*.

### Xylocopa violacea

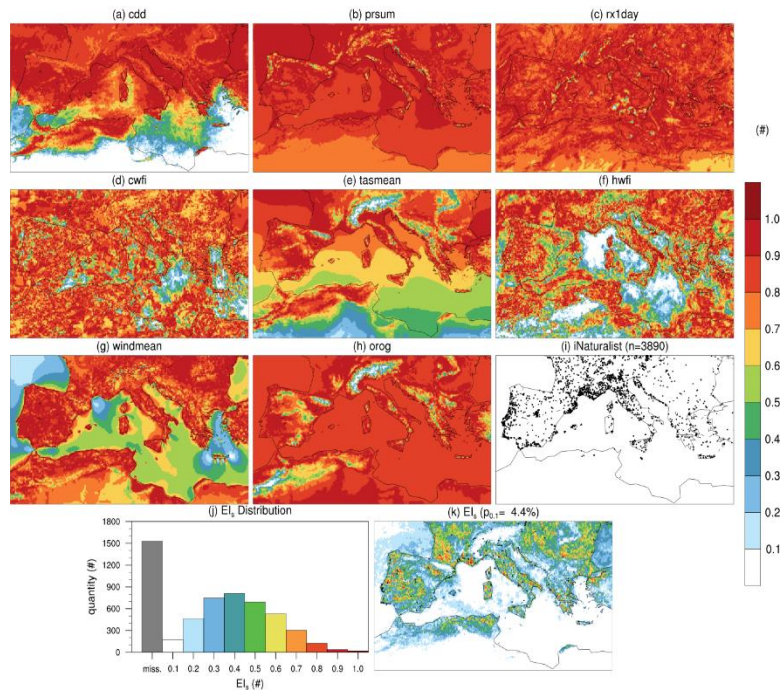

80

Figure S24. The  $EI_i$  products using WMD03, analogous to Figure 4 for *Xylocopa violacea*.
